# Supplementary material
Source: PubMed Central journal article supplement (PMC8589720)

**Supplementary material**

Study questionnaire.

**Acceptance of COVID-19 vaccination by dialysis patients.**

Please place a cursor corresponding to your answer on a scale of 0 to 10.

**1. Do you think you are a person at risk for COVID-19?**

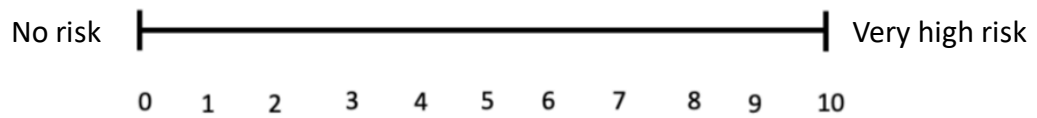

**2. Do you think that COVID-19 is a serious disease?**

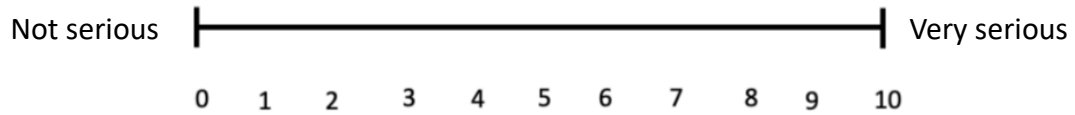

**3. Do you think you get enough information about COVID-19 from the media?**

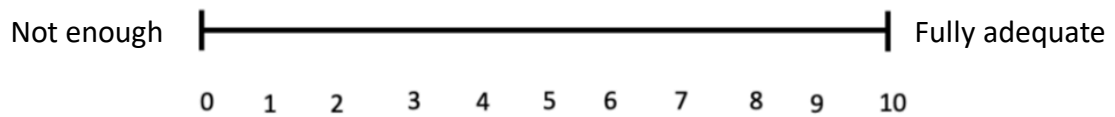

**4. Do you feel you have enough information about COVID-19 from the dialysis team?**

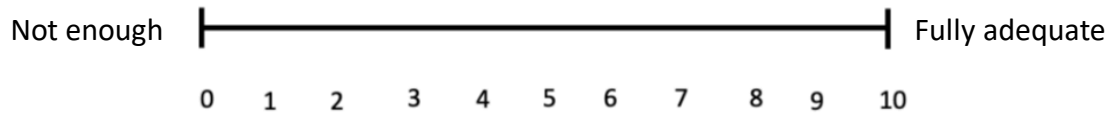

**5. Do you think you have enough information about COVID-19 vaccines from the media?**

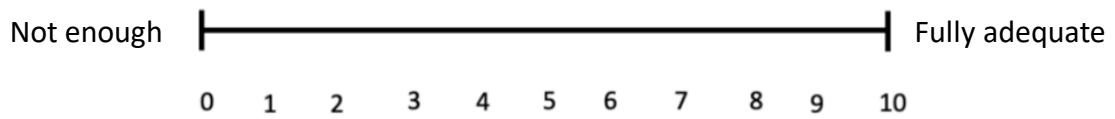

**6. Do you feel you have enough information about COVID-19 vaccines from the dialysis team?**

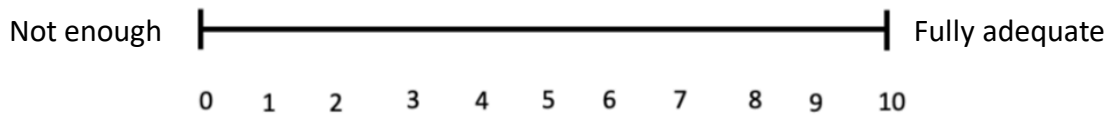

**7. Do you think it is complicated for you to get vaccinated against COVID-19?**

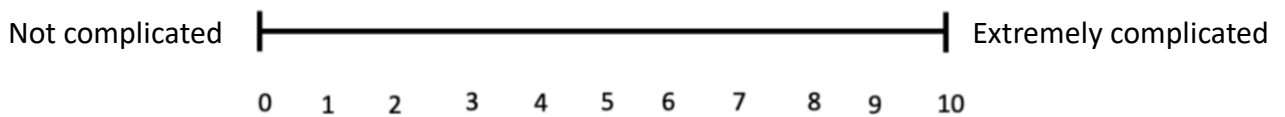

**8. Do you think that COVID-19 vaccine is effective?**

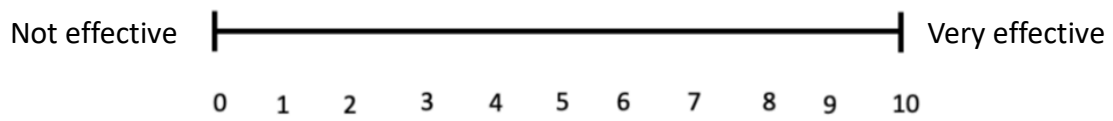

**9. Do you think that COVID-19 vaccines can cause serious side effects?**

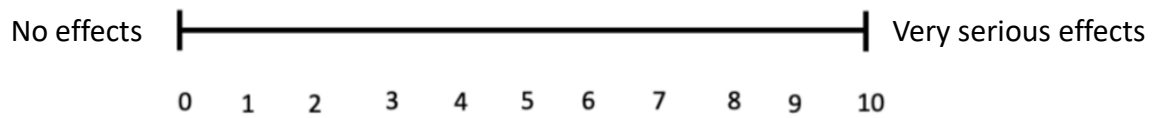

**10. Do you have any concerns about the safety of COVID-19 vaccines?**

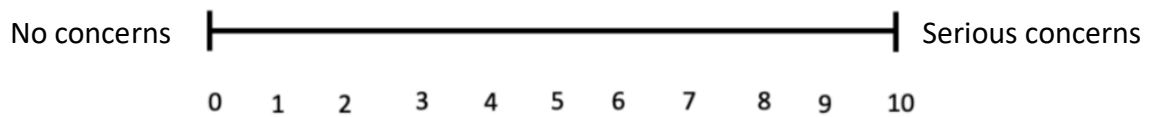

What are they? \_\_\_\_\_

**11. In general, are you in favor of vaccination?**

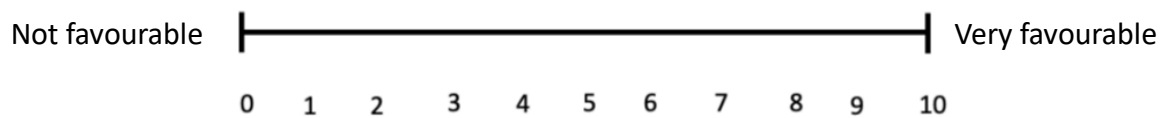

**12. Did you get your seasonal flu shot this year?**

Yes       No       I don't know

**13. In general, do you trust the authorities to manage the health crisis?**

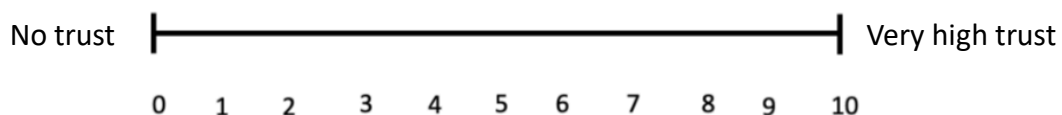

**14. In general, do you trust scientists to manage the health crisis?**

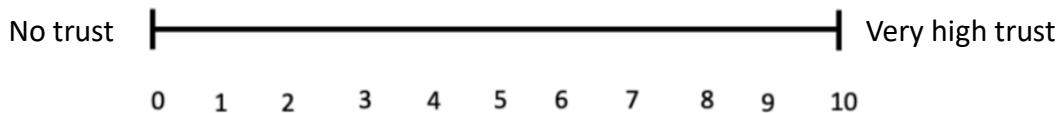

**15. Who do you trust to inform you about COVID-19 vaccines?**

- Media
- General practitioner
- Dialysis team
- Family
- Authorities
- Pharmaceutical laboratories

**16. Are you willing to be vaccinated against COVID-19?**

Yes       No       I don't know

**17. If your answered yes, say why.**

To protect yourself

Yes       No       I don't know

To protect those around you

Yes       No       I don't know

Other reasons : \_\_\_\_\_

**18. If you answered no, say why.**

\_\_\_\_\_

**Supplementary table S1.** General data on patients who did not answer the questionnaires and main reasons for declining/not being asked to participate in the study.

|                                                                               | All            | Centers       |                |                |                | p-values     |
|-------------------------------------------------------------------------------|----------------|---------------|----------------|----------------|----------------|--------------|
|                                                                               |                | Le Mans       | Cagliari       | Paris          | Pavia          |              |
| N (% of center)                                                               | 58 (12.2%)     | 9 (6.6%)      | 5 (3.6%)       | 37 (45.7%)     | 7 (6.0%)       |              |
| Age, median (min-max)                                                         | 71 (19-96)     | 69 (33-82)    | 65 (54-91)     | 72 (19-96)     | 75 (67-87)     | 0.194        |
| Gender (woman), (%)                                                           | 43.1%          | 33.3%         | 20.0%          | 46.0%          | 57.1%          | 0.547        |
| Charlson Comorbidity Index, median (min-max)                                  | 8 (2-15)       | 8 (2-12)      | 7 (4-12)       | 7 (2-14)       | 9 (5-15)       | 0.772        |
| Patients born in a country other than the one of residence, n (%)             | 34 (58.6%)     | 5 (55.6%)     | 2 (40.0%)      | 27 (73.0%)     | 0              | 0.001        |
| Education level, n (%)                                                        |                |               |                |                |                | <b>0.014</b> |
| Illiterate                                                                    | 13 (22.4%)     | 0             | 0              | 13 (35.1%)     | 0              |              |
| Primary to middle school                                                      | 27 (46.6%)     | 5 (55.6%)     | 5 (100%)       | 11 (29.7%)     | 6 (85.7%)      |              |
| Secondary school                                                              | 8 (13.8%)      | 3 (33.3%)     | 0              | 5 (13.5%)      | 0              |              |
| University                                                                    | 10 (12.2%)     | 1 (11.1%)     | 0              | 8 (21.6%)      | 1 (14.3%)      |              |
| Local language understanding, n (%)                                           |                |               |                |                |                | <b>0.047</b> |
| 0: No comprehension                                                           | 1 (1.7%)       | 0             | 0              | 1 (2.7%)       | 0              |              |
| 1:                                                                            | 5 (8.6%)       | 2 (22.2%)     | 2 (40.0%)      | 1 (2.7%)       | 0              |              |
| 2:                                                                            | 7 (12.1%)      | 2 (22.2%)     | 0              | 5 (13.5%)      | 0              |              |
| 3: Some difficulty                                                            | 5 (8.6%)       | 0             | 0              | 5 (13.5%)      | 0              |              |
| 4: Almost complete understanding                                              | 10 (17.2%)     | 0             | 0              | 10 (27.0%)     | 0              |              |
| 5: Near native speaker competence/bilingual                                   | 30 (51.7%)     | 5 (55.6%)     | 3 (60.0%)      | 15 (40.5%)     | 7 (100%)       |              |
| Activity, n (%)                                                               |                |               |                |                |                | 0.072        |
| Student                                                                       | 1 (1.7%)       | 0             | 0              | 1 (2.7%)       | 0              |              |
| Unemployed                                                                    | 19 (32.8%)     | 3 (33.3%)     | 0              | 16 (43.2%)     | 0              |              |
| Working full or part time                                                     | 6 (10.4%)      | 0             | 0              | 6 (16.2%)      | 0              |              |
| Retired                                                                       | 32 (55.2%)     | 6 (66.7%)     | 5 (100%)       | 14 (37.8%)     | 7 (100%)       |              |
| Primary kidney disease, n (%)                                                 |                |               |                |                |                | 0.005        |
| Glomerulonephritis / Systemic disease                                         | 11 (19%)       | 0             | 0              | 9 (24.3%)      | 2 (28.6%)      |              |
| Nephroangiosclerosis / Diabetes                                               | 20 (34.5%)     | 1 (11.1%)     | 1 (20.0%)      | 18 (48.7%)     | 0              |              |
| Polycystic kidney disease                                                     | 2 (3.5%)       | 0             | 1 (20.0%)      | 1 (2.7%)       | 0              |              |
| Other                                                                         | 25 (43.1%)     | 8 (88.9%)     | 3 (60.0%)      | 9 (24.3%)      | 5 (71.4%)      |              |
| Renal replacement therapy vintage (year), median (min-max)                    | 3.5 (0.1-24.1) | 1.8 (0.1-4.1) | 2.0 (1.3-19.0) | 3.6 (0.5-14.2) | 7.7 (1.1-24.1) | <b>0.025</b> |
| Type of dialysis, n (%)                                                       |                |               |                |                |                | 0.999        |
| Hemodialysis                                                                  | 57 (98.3%)     | 9 (100%)      | 5 (100%)       | 36 (97.3%)     | 7 (100%)       |              |
| Home-hemodialysis                                                             | 1 (1.7%)       | 0 (0%)        | 0 (0%)         | 1 (2.7%)       | 0 (0%)         |              |
| Reason for not completing the questionnaire                                   |                |               |                |                |                | 0.114        |
| Not able to answer (lack of language ability/cognitive impairment)            | 45 (77.6%)     | 7 (77.8%)     | 5 (100%)       | 30 (81.1%)     | 3 (42.9%)      |              |
| Decided not to answer                                                         | 13 (22.4%)     | 2 (22.2%)     | 0              | 7 (18.9%)      | 4 (57.1%)      |              |
| Previous kidney transplant, n (%)                                             | 4 (6.9%)       | 0             | 0              | 3 (8.1%)       | 1 (14.3%)      | -            |
| Vaccine not administered, n (%)                                               | 12 (20.7%)     | 3 (33.3%)     | 0              | 8 (21.6%)      | 1 (14.3%)      | 0.632        |
| Not able to be vaccinated (contraindication – COVID infection - death), n (%) | 1 (8.3%)       | 0             | 0              | 0              | 1 (100%)       | 0.083        |
| Decided to refuse the vaccination, n (%)                                      | 11 (91.7%)     | 3 (100%)      | 0              | 8 (100%)       | 0              |              |

**Supplemental table S2.** Distribution of the quantitative answers categorized into the three main scores (low: 0-3; medium 4-6; high 7-10).

| Questions                                                                               | Centers     |             |             |            |            | p-values         |
|-----------------------------------------------------------------------------------------|-------------|-------------|-------------|------------|------------|------------------|
|                                                                                         | All         | Le Mans     | Cagliari    | Paris      | Pavia      |                  |
| n                                                                                       | 417         | 128         | 136         | 44         | 109        |                  |
| Do you think you are a person at risk for COVID-19? (%)                                 |             |             |             |            |            | 0.053            |
| Low                                                                                     | 89 (21.5%)  | 17 (13.4%)  | 33 (24.3%)  | 9 (21.4%)  | 30 (27.5%) |                  |
| Medium                                                                                  | 101 (24.4%) | 39 (30.7%)  | 31 (22.8%)  | 13 (31.0%) | 18 (16.5%) |                  |
| High                                                                                    | 224 (54.1%) | 71 (55.9%)  | 72 (52.9%)  | 20 (47.6%) | 61 (56%)   |                  |
| Do you think that COVID-19 is a serious disease?                                        |             |             |             |            |            | 0.499            |
| Low                                                                                     | 26 (6.3%)   | 7 (5.5%)    | 10 (7.4%)   | 1 (2.4%)   | 8 (7.4%)   |                  |
| Medium                                                                                  | 54 (13.1%)  | 20 (15.7%)  | 12 (8.8%)   | 5 (11.9%)  | 17 (15.7%) |                  |
| High                                                                                    | 333 (80.6%) | 100 (78.7%) | 114 (83.8%) | 36 (85.7%) | 83 (76.9%) |                  |
| Do you think you get enough information about COVID-19 from the media?                  |             |             |             |            |            | 0.080            |
| Low                                                                                     | 66 (15.9%)  | 22 (17.3%)  | 20 (14.7%)  | 3 (7.1%)   | 21 (19.3%) |                  |
| Medium                                                                                  | 97 (23.4%)  | 26 (20.5%)  | 39 (28.7%)  | 5 (11.9%)  | 27 (24.8%) |                  |
| High                                                                                    | 251 (60.6%) | 79 (62.2%)  | 77 (56.6%)  | 34 (81%)   | 61 (56%)   |                  |
| Do you feel you have enough information about COVID-19 from the dialysis team?          |             |             |             |            |            | <b>&lt;0.001</b> |
| Low                                                                                     | 102 (24.8%) | 52 (40.6%)  | 20 (15%)    | 4 (9.8%)   | 26 (23.9%) |                  |
| Medium                                                                                  | 98 (23.8%)  | 32 (25%)    | 31 (23.3%)  | 11 (26.8%) | 24 (22%)   |                  |
| High                                                                                    | 211 (51.3%) | 44 (34.4%)  | 82 (61.7%)  | 26 (63.4%) | 59 (54.1%) |                  |
| Do you think you have enough information about COVID-19 vaccines from the media?        |             |             |             |            |            | 0.681            |
| Low                                                                                     | 98 (23.8%)  | 33 (26.4%)  | 30 (22.1%)  | 8 (19.5%)  | 27 (24.8%) |                  |
| Medium                                                                                  | 130 (31.6%) | 36 (28.8%)  | 47 (34.6%)  | 10 (24.4%) | 37 (33.9%) |                  |
| High                                                                                    | 183 (44.5%) | 56 (44.8%)  | 59 (43.4%)  | 23 (56.1%) | 45 (41.3%) |                  |
| Do you feel you have enough information about COVID-19 vaccines from the dialysis team? |             |             |             |            |            | <b>&lt;0.001</b> |
| Low                                                                                     | 132 (32.4%) | 67 (53.2%)  | 28 (21.1%)  | 6 (15%)    | 31 (28.4%) |                  |
| Medium                                                                                  | 105 (25.7%) | 36 (28.6%)  | 37 (27.8%)  | 10 (25%)   | 22 (20.2%) |                  |
| High                                                                                    | 171 (41.9%) | 23 (18.3%)  | 68 (51.1%)  | 24 (60%)   | 56 (51.4%) |                  |
| Do you think it is complicated for you to get vaccinated against COVID-19?              |             |             |             |            |            | 0.553            |
| Low                                                                                     | 251 (61.7%) | 77 (63.1%)  | 84 (61.8%)  | 21 (52.5%) | 69 (63.3%) |                  |
| Medium                                                                                  | 70 (17.2%)  | 20 (16.4%)  | 28 (20.6%)  | 8 (20%)    | 14 (12.8%) |                  |
| High                                                                                    | 86 (21.1%)  | 25 (20.5%)  | 24 (17.6%)  | 11 (27.5%) | 26 (23.9%) |                  |
| Do you think that COVID-19 vaccine is effective?                                        |             |             |             |            |            | <b>&lt;0.001</b> |
| Low                                                                                     | 40 (10%)    | 19 (16.1%)  | 9 (6.6%)    | 8 (19%)    | 4 (3.8%)   |                  |
| Medium                                                                                  | 117 (29.1%) | 53 (44.9%)  | 36 (26.5%)  | 10 (23.8%) | 18 (17%)   |                  |
| High                                                                                    | 245 (60.9%) | 46 (39%)    | 91 (66.9%)  | 24 (57.1%) | 84 (79.2%) |                  |
| Do you think that COVID-19 vaccines can cause serious side effects?                     |             |             |             |            |            | <b>0.047</b>     |
| Low                                                                                     | 143 (35.5%) | 30 (25.4%)  | 48 (35.6%)  | 14 (33.3%) | 51 (47.2%) |                  |
| Medium                                                                                  | 142 (35.2%) | 49 (41.5%)  | 49 (36.3%)  | 13 (31%)   | 31 (28.7%) |                  |
| High                                                                                    | 118 (29.3%) | 39 (33.1%)  | 38 (28.1%)  | 15 (35.7%) | 26 (24.1%) |                  |
| Do you have any concerns about the safety of COVID-19 vaccines?                         |             |             |             |            |            | 0.575            |
| Low                                                                                     | 210 (51.2%) | 57 (45.2%)  | 74 (55.2%)  | 20 (47.6%) | 59 (54.6%) |                  |
| Medium                                                                                  | 75 (18.3%)  | 27 (21.4%)  | 22 (16.4%)  | 6 (14.3%)  | 20 (18.5%) |                  |
| High                                                                                    | 125 (30.5%) | 42 (33.3%)  | 38 (28.4%)  | 16 (38.1%) | 29 (26.9%) |                  |
| In general, are you in favor of vaccination?                                            |             |             |             |            |            | <b>&lt;0.001</b> |
| Low                                                                                     | 35 (8.5%)   | 18 (14.1%)  | 3 (2.2%)    | 10 (24.4%) | 4 (3.7%)   |                  |

|                                                                       |             |            |             |            |            |       |
|-----------------------------------------------------------------------|-------------|------------|-------------|------------|------------|-------|
| Medium                                                                | 39 (9.4%)   | 12 (9.4%)  | 11 (8.1%)   | 3 (7.3%)   | 13 (11.9%) |       |
| High                                                                  | 340 (82.1%) | 98 (76.6%) | 122 (89.7%) | 28 (68.3%) | 92 (84.4%) | 0.571 |
| In general, do you trust the authorities to manage the health crisis? |             |            |             |            |            |       |
| Low                                                                   | 119 (29%)   | 33 (26.4%) | 39 (29.1%)  | 12 (28.6%) | 35 (32.1%) |       |
| Medium                                                                | 126 (30.7%) | 41 (32.8%) | 45 (33.6%)  | 15 (35.7%) | 25 (22.9%) |       |
| High                                                                  | 165 (40.2%) | 51 (40.8%) | 50 (37.3%)  | 15 (35.7%) | 49 (45%)   |       |
| In general, do you trust scientists to manage the health crisis?      |             |            |             |            |            | 0.286 |
| Low                                                                   | 49 (12%)    | 17 (13.4%) | 16 (11.9%)  | 7 (17.9%)  | 9 (8.4%)   |       |
| Medium                                                                | 110 (27%)   | 32 (25.2%) | 32 (23.9%)  | 15 (38.5%) | 31 (29%)   |       |
| High                                                                  | 248 (60.9%) | 78 (61.4%) | 86 (64.2%)  | 17 (43.6%) | 67 (62.6%) |       |



**Supplementary table S3.** Univariate logistic regression correlating COVID-19 vaccine hesitancy (refusal in the questionnaire). Analogic scores analyzed as continuous scores.

| Univariate analysis                                                                                            | Odds-ratio   | CI 95%       |              | p-values         |
|----------------------------------------------------------------------------------------------------------------|--------------|--------------|--------------|------------------|
|                                                                                                                |              | Lower        | Higher       |                  |
| Covid-19 vaccine acceptancy questionnaire                                                                      |              |              |              |                  |
| <b>Do you think you are a person at risk for COVID-19? (Low vs. Medium and High)</b>                           | <b>0.551</b> | <b>0.381</b> | <b>0.792</b> | <b>0.001</b>     |
| <b>Do you think that COVID-19 is a serious disease? (Low, Medium and High)</b>                                 | <b>0.444</b> | <b>0.291</b> | <b>0.688</b> | <b>&lt;0.001</b> |
| Do you think you get enough information about COVID-19 from the media? (Low, Medium and High)                  | 0.797        | 0.525        | 1.138        | 0.175            |
| Do you feel you have enough information about COVID-19 from the dialysis team? (Low, Medium and High)          | 0.707        | 0.494        | 1.013        | 0.057            |
| <b>Do you think you have enough information about COVID-19 vaccines from the media? (Low, Medium and High)</b> | <b>0.581</b> | <b>0.393</b> | <b>0.851</b> | <b>0.007</b>     |
| Do you feel you have enough information about COVID-19 vaccines from the dialysis team? (Low, Medium and High) | 0.705        | 0.487        | 1.012        | 0.060            |
| <b>Do you think that COVID-19 vaccine is effective? (Low, Medium and High)</b>                                 | <b>0.123</b> | <b>0.070</b> | <b>0.204</b> | <b>&lt;0.001</b> |
| <b>In general, are you in favor of vaccination? (Low, Medium and High)</b>                                     | <b>0.157</b> | <b>0.100</b> | <b>0.238</b> | <b>&lt;0.001</b> |
| <b>In general, do you trust the authorities to manage the health crisis? (Low, Medium and High)</b>            | <b>0.401</b> | <b>0.260</b> | <b>0.597</b> | <b>&lt;0.001</b> |
| <b>Do you think it is complicated for you to get vaccinated against COVID-19? (Low, Medium and High)</b>       | <b>2.434</b> | <b>1.686</b> | <b>3.565</b> | <b>&lt;0.001</b> |
| <b>Do you think that COVID-19 vaccines can cause serious side effects? (Low, Medium and High)</b>              | <b>3.892</b> | <b>2.397</b> | <b>6.741</b> | <b>&lt;0.001</b> |
| <b>Do you have any concerns about the safety of COVID-19 vaccines? (Low, Medium and High)</b>                  | <b>0.157</b> | <b>0.100</b> | <b>0.238</b> | <b>&lt;0.001</b> |
| <b>In general, do you trust scientists to manage the health crisis? (Low, Medium and High)</b>                 | <b>0.283</b> | <b>0.184</b> | <b>0.426</b> | <b>&lt;0.001</b> |
| <b>Did you get your seasonal flu shot this year? (refusal)</b>                                                 | <b>4.451</b> | <b>2.351</b> | <b>8.776</b> | <b>&lt;0.001</b> |

Statistically significant data are in bold.

**Supplementary table S4.** Univariate logistic regression correlating COVID-19 vaccine hesitancy (refusal in the questionnaire) dichotomized as high (7-10) versus low scores (0-6).

| Univariate analysis                                                                                               | Odds-ratio   | CI 95%       |              | p-values         |
|-------------------------------------------------------------------------------------------------------------------|--------------|--------------|--------------|------------------|
|                                                                                                                   |              | Lower        | Higher       |                  |
| <b>Covid-19 vaccine acceptancy questionnaire</b>                                                                  |              |              |              |                  |
| Do you think you are a person at risk for COVID-19? (High vs. Medium and Low)                                     | 0.916        | 0.612        | 1.370        | 0.669            |
| Do you think that COVID-19 is a serious disease? (High vs. Medium and Low)                                        | 0.741        | 0.450        | 1.222        | 0.240            |
| Do you think you get enough information about COVID-19 from the media? (High vs. Medium and Low)                  | 0.764        | 0.507        | 1.151        | 0.198            |
| Do you feel you have enough information about COVID-19 from the dialysis team? (High vs. Medium and Low)          | 1.091        | 0.728        | 1.635        | 0.673            |
| Do you think you have enough information about COVID-19 vaccines from the media? (High vs. Medium and Low)        | 0.771        | 0.512        | 1.161        | 0.213            |
| Do you feel you have enough information about COVID-19 vaccines from the dialysis team? (High vs. Medium and Low) | 1.152        | 0.765        | 1.736        | 0.499            |
| <b>Do you think that COVID-19 vaccine is effective? (High vs. Medium and Low)</b>                                 | <b>0.393</b> | <b>0.258</b> | <b>0.599</b> | <b>&lt;0.001</b> |
| <b>In general, are you in favor of vaccination? (High vs. Medium and Low)</b>                                     | <b>0.322</b> | <b>0.192</b> | <b>0.540</b> | <b>&lt;0.001</b> |
| In general, do you trust the authorities to manage the health crisis? (High vs. Medium and Low)                   | 0.760        | 0.501        | 1.152        | 0.196            |
| <b>Do you think it is complicated for you to get vaccinated against COVID-19? (High vs. Medium and Low)</b>       | <b>2.349</b> | <b>1.447</b> | <b>3.814</b> | <b>&lt;0.001</b> |
| <b>Do you think that COVID-19 vaccines can cause serious side effects? (High vs. Medium and Low)</b>              | <b>1.597</b> | <b>1.028</b> | <b>2.481</b> | <b>0.037</b>     |
| <b>Do you have any concerns about the safety of COVID-19 vaccines? (High vs. Medium and Low)</b>                  | <b>2.689</b> | <b>1.739</b> | <b>4.156</b> | <b>&lt;0.001</b> |
| <b>In general, do you trust scientists to manage the health crisis? (High vs. Medium and Low)</b>                 | <b>0.603</b> | <b>0.398</b> | <b>0.911</b> | <b>0.016</b>     |

**Supplementary table S5. Some thematic comments on the questionnaires.**

| Center   | Sex | Age | Do you have any concerns about the safety of COVID-19 vaccines?                                   |
|----------|-----|-----|---------------------------------------------------------------------------------------------------|
| Le Mans  | M   | 79  | Too much conflicting information, no confidence                                                   |
| Le Mans  | F   | 56  | I do and say what my son says                                                                     |
| Le Mans  | M   | 41  | Fear of contracting Covid-19                                                                      |
| Le Mans  | F   | 81  | Fear of contracting other illness (grandson had cancer following a vaccine)                       |
| Le Mans  | M   | 88  | No particular concerns but small doubts                                                           |
| Le Mans  | M   | 73  | Firstly because of no confidence in laboratories and secondly, it's a matter of finance           |
| Paris    | F   | 42  | Side effects: facial deformity                                                                    |
| Pavia    | F   | 81  | Everything                                                                                        |
| Centre   | Sex | Age | Who do you trust to inform you about COVID-19 vaccines?                                           |
| Le Mans  | M   | 64  | The WHO Director                                                                                  |
| Le Mans  | M   | 87  | The respondent himself                                                                            |
| Centre   | Sex | Age | Other reasons for getting vaccinated?                                                             |
| Cagliari | F   | 63  | No more testing for SARS CoV2                                                                     |
| Le Mans  | M   | 66  | Return of social activities (evenings with friends, going to restaurants, playing pétanque, etc.) |
| Paris    | F   | 52  | No other choice                                                                                   |
| Paris    | M   | 85  | Out of curiosity                                                                                  |
| Paris    | F   | 43  | To reassure my daughter                                                                           |
| Centre   | Sex | Age | Reason for refusing vaccination                                                                   |
| Le Mans  | M   | 79  | We are making too much fuss about this virus                                                      |
| Le Mans  | F   | 56  | My son does not want me to be vaccinated                                                          |
| Le Mans  | F   | 66  | My granddaughter has advised me against it                                                        |
| Le Mans  | M   | 56  | Family decision                                                                                   |
| Le Mans  | M   | 82  | Not for the moment, may be in the future                                                          |
| Le Mans  | M   | 60  | I consider myself too young to be vaccinated against Covid-19                                     |
| Paris    | M   | 57  | I want to wait until all French people are vaccinated, I want to wait 5 years                     |
| Pavia    | F   | 76  | Because the vaccine is not produced by the dialysis team but from external enterprises            |
| Cagliari | F   | 59  | Because I am not afraid, I have already been through bad situations                               |
| Cagliari | F   | 60  | I don't feel ready!                                                                               |
| Cagliari | M   | 65  | My wife is against vaccination. I cannot risk divorce for a vaccine!                              |
| Pavia    | F   | 81  | The vaccine is a joke! The manufacturers only try to make money by scaring us                     |
| Pavia    | M   | 63  | Because I don't want to be injected with something that can change my genetic code                |

**Supplementary figure S1.** Flow chart of the study population: single center data.

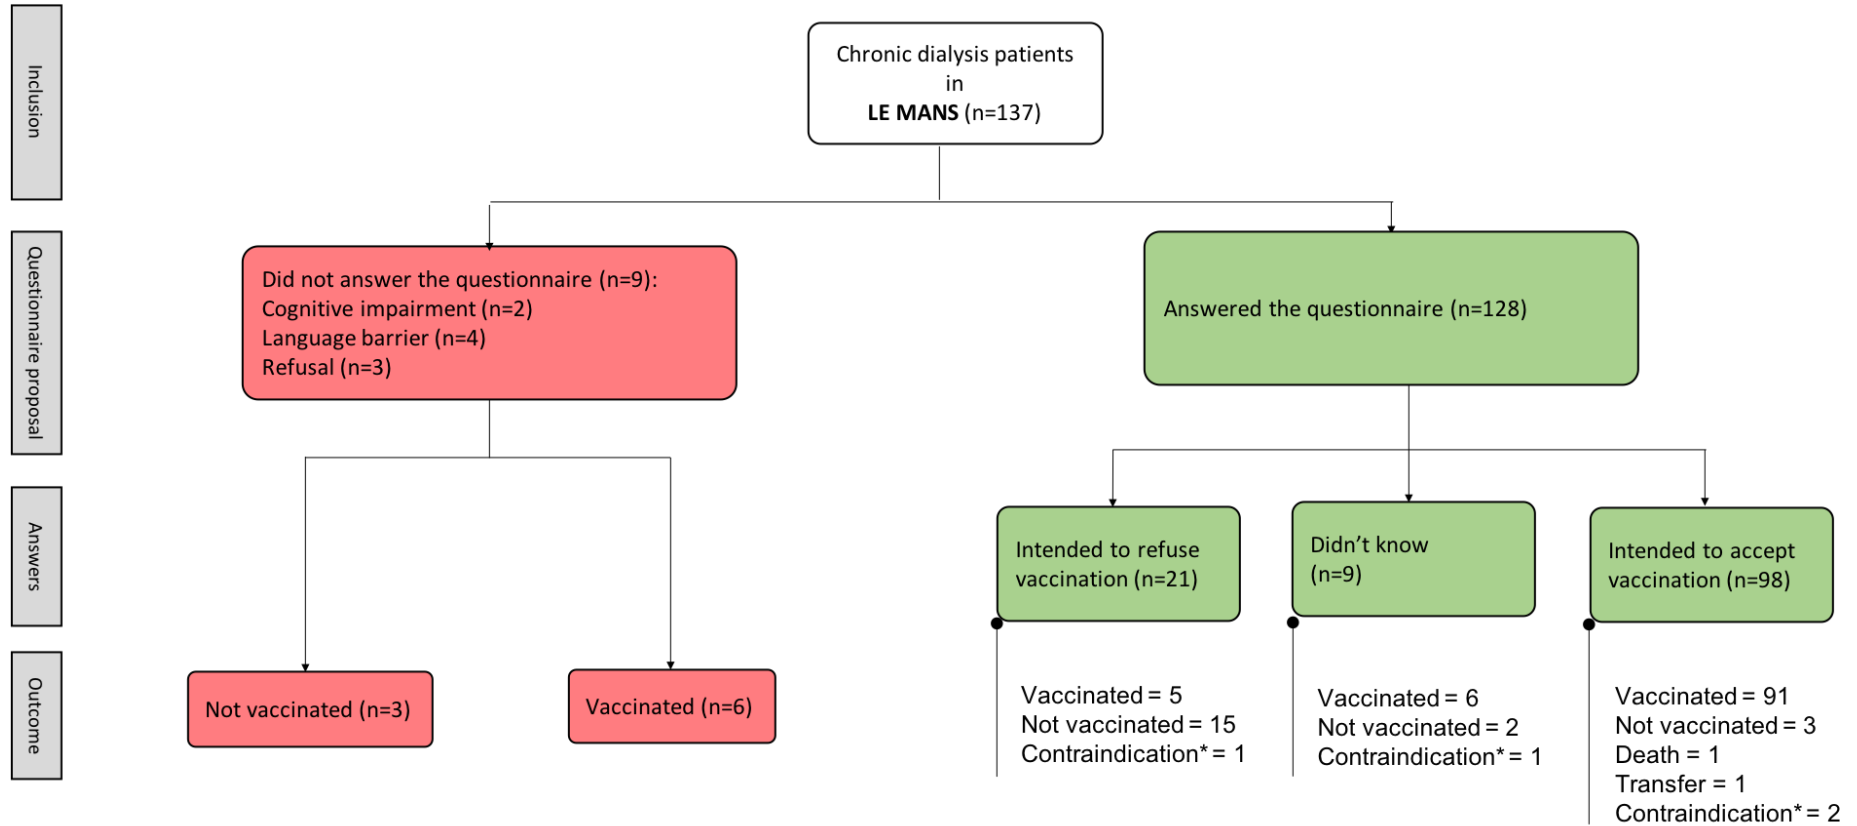

**Final data: Vaccination (78.9%), Refusal (16.8%), Contraindication\* (2.9%), Transfer (0.7%), Death (0.7%)**

\*Contraindication: hospitalization, recent COVID-19, plasma exchanges.

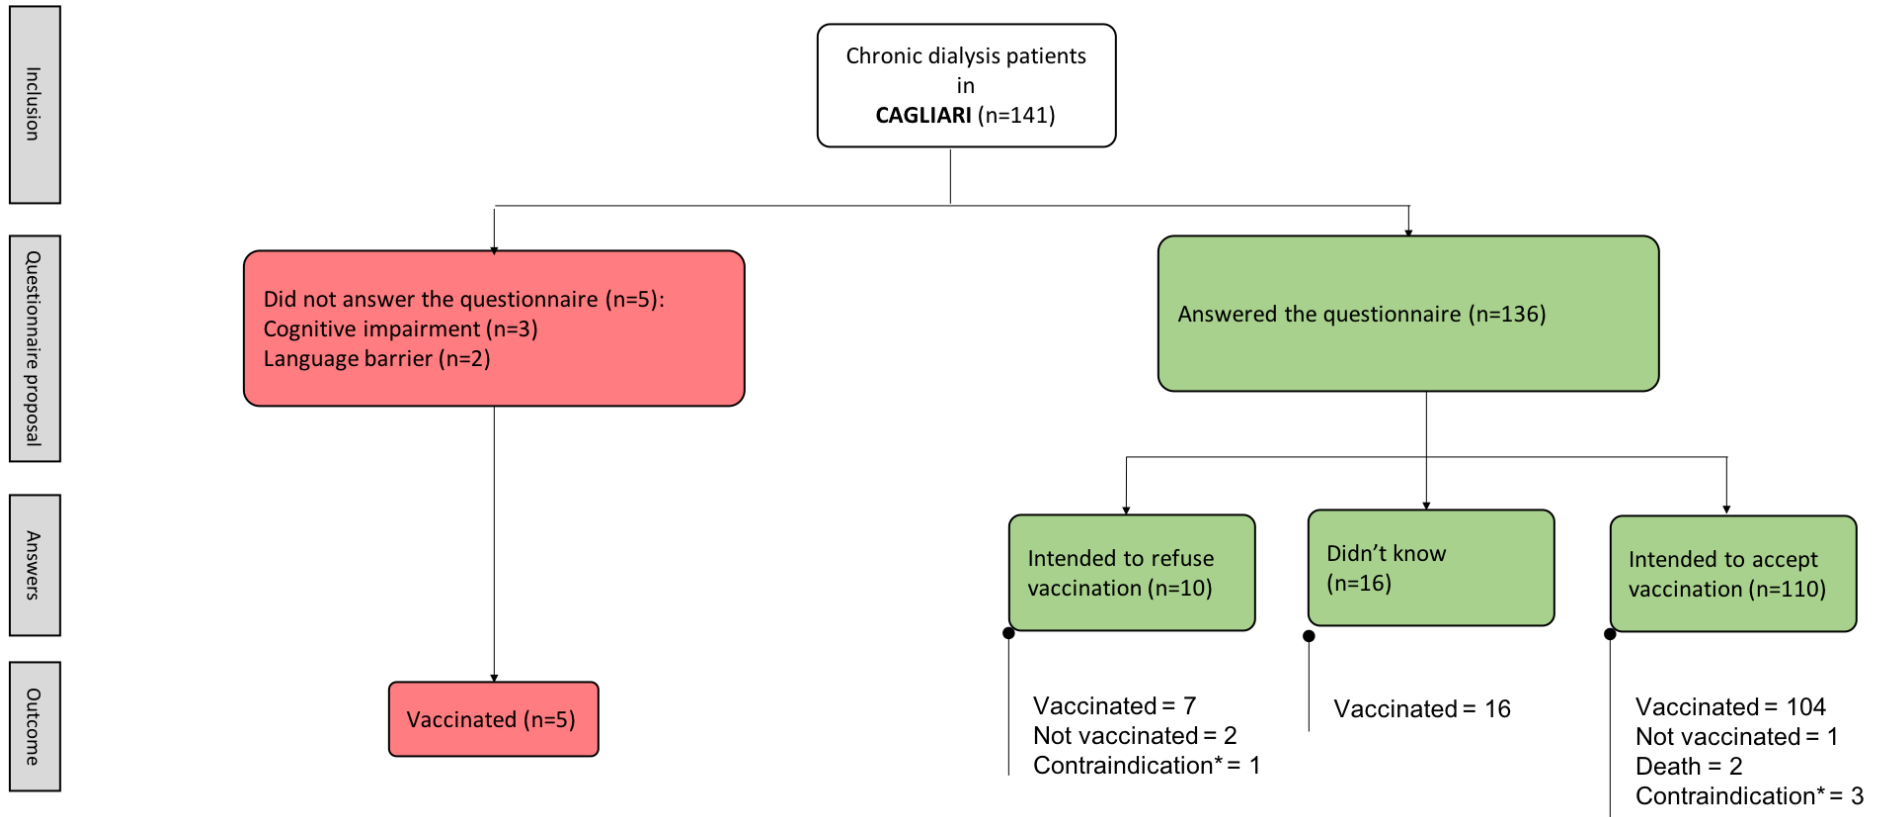

**Final data: Vaccination (93.6%), Refusal (2.2%), Contraindication\* (2.8%), Death (1.4%)**

\*Contraindication: hospitalization, recent COVID-19, plasma exchanges.

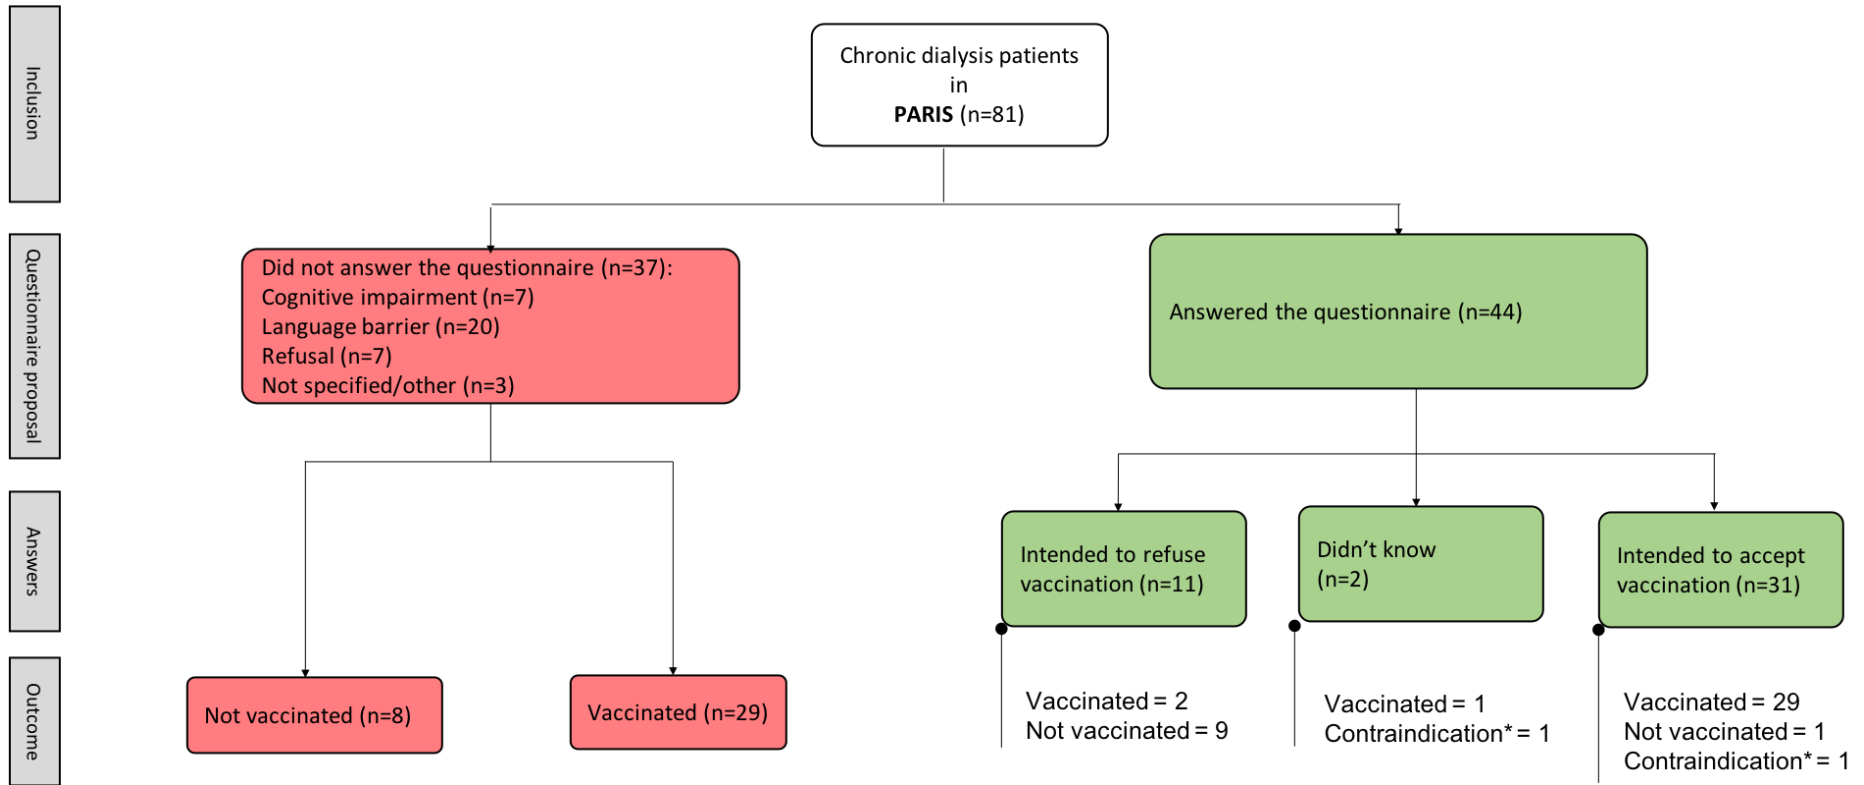

**Final data: Vaccination (75.3%), Refusal (22.2%), Contraindication\* (2.5%)**

\*Contraindication: hospitalization, recent COVID-19, plasma exchanges.

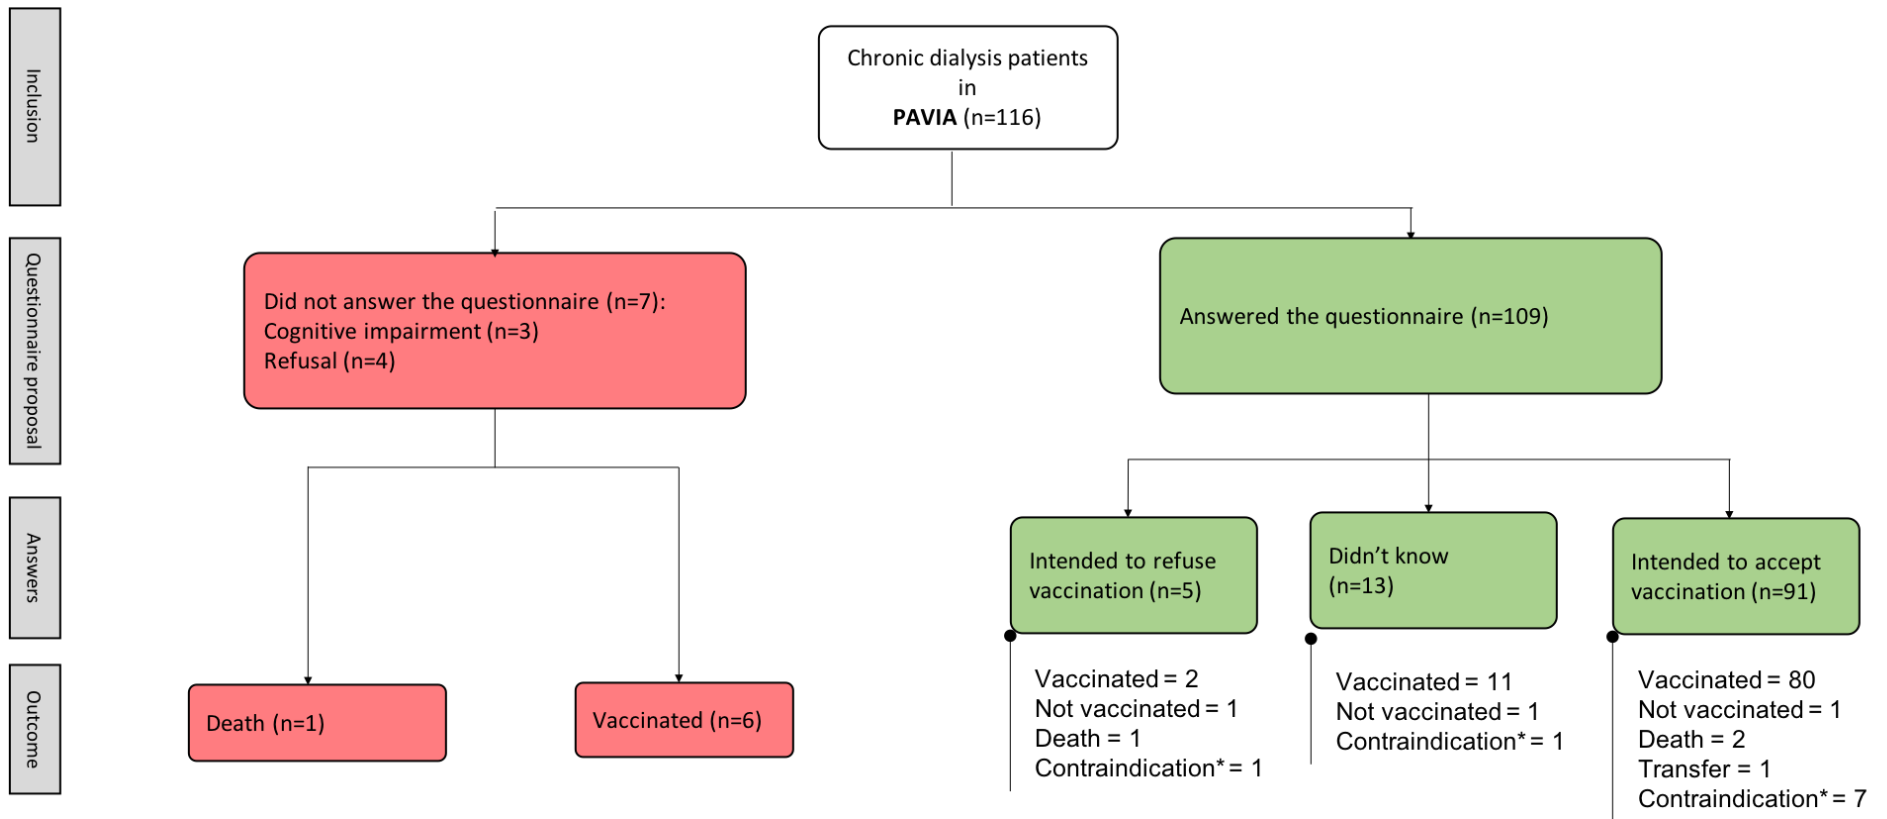

**Final data: Vaccination (85.3%), Refusal (2.6%), Contraindication\* (7.8%), Transfer (0.9%), Death (3.4%)**

\*Contraindication: hospitalization, recent COVID-19, plasma exchanges.

**Supplementary figure S2.** Detail of responses given in the questionnaire.

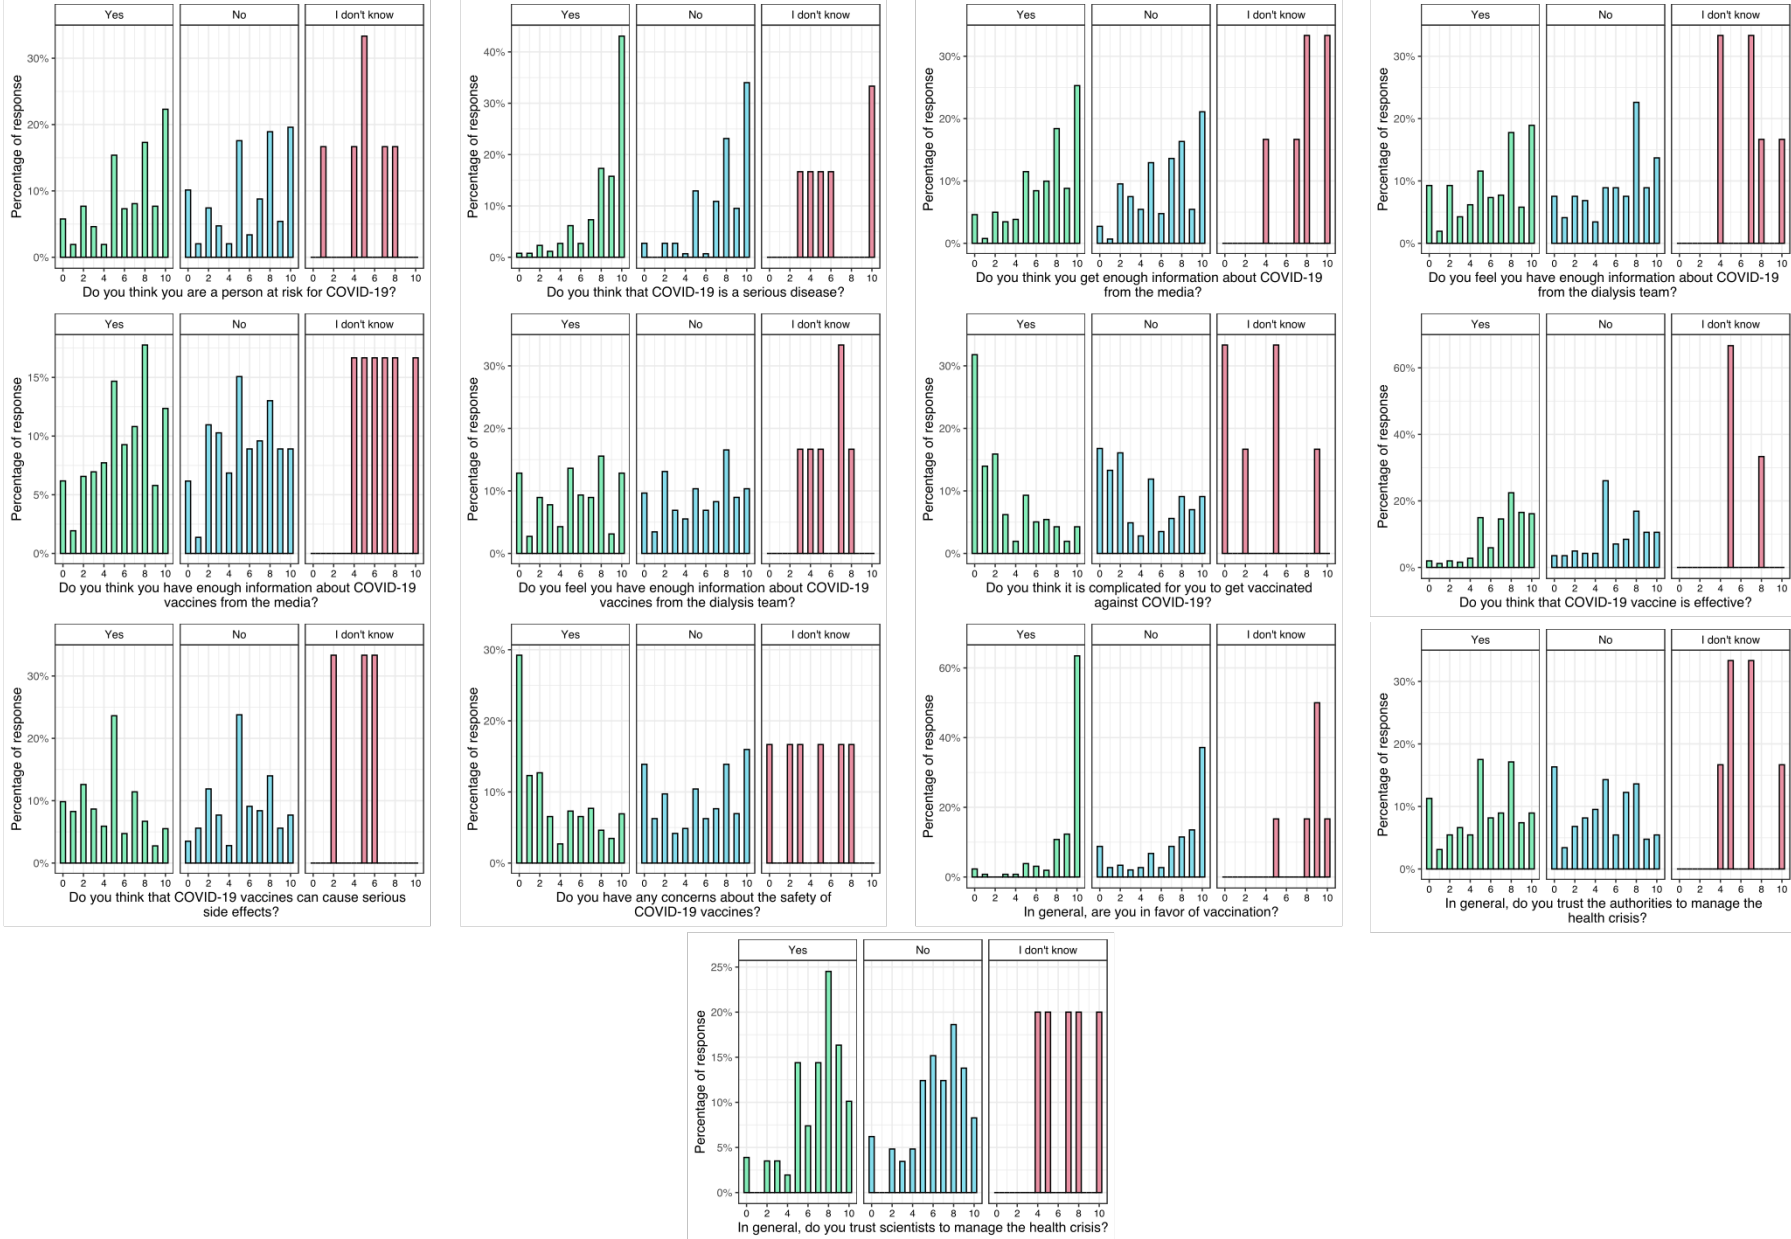



**Supplementary Figure S3.** Residuals of the multivariate analysis with vaccine refusal as outcome. Explanatory variables dichotomized (low scores vs others).

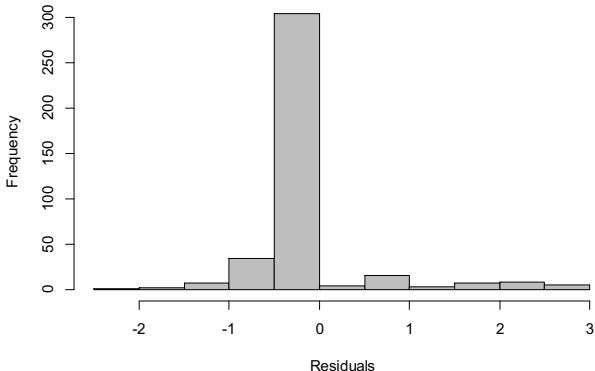

**Supplementary figure S4.** Residuals of the multivariate analysis with vaccine refusal as outcome. Explanatory variables dichotomized (higher scores vs others).

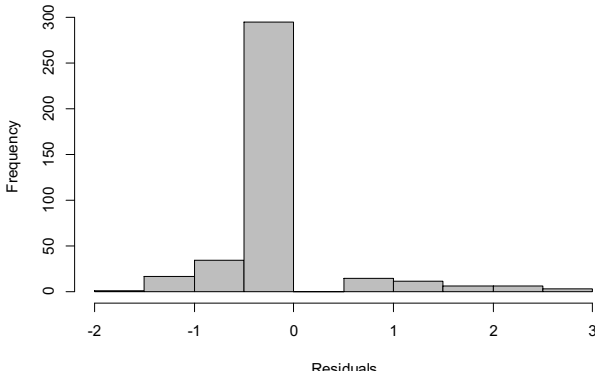

Supplement: mmc1.pdf [file mmc1.pdf]
